# Supplementary material for: Kinematics and extent of the Piemont–Liguria Basin – implications for subduction processes in the Alps
Source: Copernicus journal article supplement (doi:10.5194/se-12-885-2021), 2021-04-21
Supplement: Supplementary file 1 [file se-12-885-2021-supplement.zip]

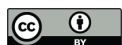

*Supplement of*

**Kinematics and extent of the Piemonte–Liguria Basin – implications for subduction processes in the Alps**

**Eline Le Breton et al.**

*Correspondence to:* Eline Le Breton ([eline.lebreton@fu-berlin.de](mailto:eline.lebreton@fu-berlin.de))

- [se-12-885-2021-supplement-title-page.pdf](#)
- [MovieS1\\_LeBreton-et-al-SolidEarth.mp4](#)

The copyright of individual parts of the supplement might differ from the article licence.
